# Supplementary material
Source: PubMed Central journal article supplement (PMC4810466)

## Supplementary Information

### Supplementary Figure legends:

**Supplementary Figure S1:** Analysis of *GAL10* antisense transcription in the *esa1-ts* mutant and wild type strains. **(A)** RT-PCR analysis. *GAL10* antisense transcript level with respect to *ACT1* in the *esa1-ts* mutant strain. **(B)** Real-time PCR analysis of *GAL10* antisense transcript level with respect to *ACT1*. Real-time PCR analysis was performed in the Davie laboratory (Judith K. Davie; Southern Illinois University). **(C)** Amplification of genomic DNA using PCR primer pairs targeted to the *GAL7* coding sequence (Region N in Figure 1A) and *GAL1* core promoter (Region P in Figure 1A). **(D)** PCR analysis of cDNA of Figure 1B, using primer pair targeted to the region P (i.e., *GAL1* core promoter; Figure 1A).

**Supplementary Figure 2:** Dilution factor analysis of DNA samples for PCR. **(A and B)** PCR analysis of the DNA samples of Figure 2A at various dilutions using the primer pair targeted to 18S rDNA. Maximum ChIP signal was set to 100. Other ChIP signals relative to maximum ChIP signal were plotted in the form of a histogram in panel B.

## Supplementary Tables:

**Supplementary Table 1:** List of strains used in this study.

| Strain  | Genotype                                                                                                                              | References                  |
|---------|---------------------------------------------------------------------------------------------------------------------------------------|-----------------------------|
| LPY3498 | <i>MAT a his3Δ200 leu2-3,112 trp1Δ1 ura3-52 ESA1</i>                                                                                  | Clarke et al (1).           |
| LPY3291 | <i>MAT a his3Δ200 leu2-3,112 trp1Δ1 ura3-52 esa1Δ::HIS3 esa1-414</i>                                                                  | Clarke et al (1).           |
| FY406   | <i>MATa hta1-htb1Δ::LEU2 hta2-htb2Δ::TRP1 leu2Δ1 ura3-52 trp1Δ63 his3Δ200 pJH23 (FB1251) HIS3 AMP CEN HTA1 FLAG-HTB2</i>              | Schwabish and Struhl (3)    |
| MSY143  | <i>MATa hta1-htb1Δ::LEU2 hta2-htb2Δ::TRP1 leu2Δ1 ura3-52 trp1Δ63 his3Δ200 swi2Δ::KanMX pJH23 (FB1251) HIS3 AMP CEN HTA1 FLAG-HTB2</i> | Schwabish and Struhl (2, 3) |
| FM392   | <i>MATα hisΔ1 leu2Δ0 met15Δ0 ura3Δ0</i>                                                                                               | Research Genetics           |
| STY1    | <i>MATα hisΔ1 leu2Δ0 met15Δ0 ura3Δ0 Cps60-TAP</i>                                                                                     | Lee et al (4)               |
| STY2    | <i>MATα hisΔ1 leu2Δ0 met15Δ0 ura3Δ0 rad6Δ Cps60-TAP</i>                                                                               | Lee et al (4)               |
| DY7014  | <i>MATa ura3-1 leu2-3,-112 his3-11,-15 trp1-1 ade2-1 can1-100 paf1Δ::URA3</i>                                                         | Biswas et al (5)            |
| W303a   | <i>MATa ura3-1 leu2-3,-112 his3-11,-15 trp1-1 ade2-1 can1-100</i>                                                                     | Thomas and Rothstein (6)    |
| FY67    | <i>MATa trp1Δ63</i>                                                                                                                   | Roberts and Winston (7)     |
| FY1097  | <i>MATa trp1Δ63 spt20Δ100::URA3 ura3-52</i>                                                                                           | Roberts and Winston (7)     |
| YKH045  | <i>MATa htb1-1 htb2-1 leu2-3,-112 his3-11,-15 trp1-1 ura3-1 ade2-1 can1-100 GAPDH::HA-UB14::URA3 &lt;pRS314-Flag-HTB1&gt;</i>         | Henry et al (8)             |
| BY4741  | <i>MATa his3Δ1 leu2Δ0 met15Δ0 ura3Δ0</i>                                                                                              | Open Biosystems             |
| Δset3   | <i>MATa his3Δ1 leu2Δ0 met15Δ0 ura3Δ0 set3Δ::KanMX</i>                                                                                 | Open Biosystems             |
| Δrpd3   | <i>MATa his3Δ1 leu2Δ0 met15Δ0 ura3Δ0 rpd3Δ::KanMX</i>                                                                                 | Open Biosystems             |
| ASY16   | <i>MATa ura3-1 leu2-3,-112 his3-11,-15 trp1-1 ade2-1 can1-100 set1Δ::URA3</i>                                                         | Shukla et al (9)            |
| ZDY2    | <i>MATa ura3-1 leu2-3,-112 his3-11,-15 trp1-1 ade2-1 can1-100 RAD26-Myc (KanMX)</i>                                                   | Malik et al (10, 11)        |

|        |                                                                                                                                              |                     |
|--------|----------------------------------------------------------------------------------------------------------------------------------------------|---------------------|
| SLY7   | <i>MATa ura3-1 leu2-3,-112 his3-11,-15 trp1-1 ade2-1 can1-100 set2Δ::URA3 RAD26-Myc (KanMX)</i>                                              | Malik et al (11)    |
| PSY2   | <i>MATa ura3-1 leu2-3,-112 his3-11,-15 trp1-1 ade2-1 can1-100 RAD6-Myc (KanMX)</i>                                                           | Bhaumik lab         |
| PSY4   | <i>MATa ura3-1 leu2-3,-112 his3-11,-15 trp1-1 ade2-1 can1-100 SET1-Myc (KanMX)</i>                                                           | Bhaumik lab         |
| Sc599  | <i>MATα ade2-1 ura3-1 his3-11 trp1-1 leu2-3,-112 can1-100</i>                                                                                | Russel et al (12)   |
| BUY12  | <i>MATα ade2-1 ura3-1 his3-11 trp1-1 leu2-3,-112 can1-100 ESA1-Myc (KanMx)</i>                                                               | Uprety et al (13)   |
| BUY24  | <i>MATa ura3-1 leu2-3,-112 his3-11,-15 trp1-1 ade2-1 can1-100 eaf1Δ::HIS3</i>                                                                | Uprety et al (14)   |
| Jon538 | <i>MATa ura3-52 trp1-Δ63 his3-Δ200 Leu2::PET56</i>                                                                                           | Houseley et al (15) |
| Jon811 | <i>MATa ura3-52 trp1-Δ63 his3-Δ200 Leu2::PET56 GAL10 reb1Δbs</i>                                                                             | Houseley et al (15) |
| BUY45  | <i>MATa ura3-52 trp1-Δ63 his3-Δ200 Leu2::PET56 ESA1-Myc (KanMX)</i>                                                                          | This study          |
| BUY46  | <i>MATa ura3-52 trp1-Δ63 his3-Δ200 Leu2::PET56 GAL10 reb1Δbs ESA1-Myc (KanMX)</i>                                                            | This study          |
| BUY57  | <i>MATa htb1-1 htb2-1 leu2-3,-112 his3-11,-15 trp1-1 ura3-1 ade2-1 can1-100 GAPDH::HA-UB14::URA3 &lt;pRS314-Flag-HTB1&gt; bre1Δ500::HIS3</i> | This study          |
| RSY69  | <i>MATa ura3-1 leu2-3,-112 his3-11,-15 trp1-1 ade2-1 can1-100 eaf1Δ::HIS3 EAF5-Myc (KanMX)</i>                                               | Uprety et al (14)   |
| RSY70  | <i>MATa ura3-1 leu2-3,-112 his3-11,-15 trp1-1 ade2-1 can1-100 EAF5-Myc (KanMX)</i>                                                           | Uprety et al (14)   |

## References:

1. Clarke AS, Lowell JE, Jacobson SJ, Pillus L. 1999. Esa1p is an essential histone acetyltransferase required for cell cycle progression. *Mol. Cell. Biol.*, 19: 2515–2526.
2. Schwabish MA, Struhl K. 2007. The Swi/Snf complex is important for histone eviction during transcriptional activation and RNA polymerase II elongation in vivo. *Mol. Cell Biol.*, 27: 6987–6995
3. Schwabish MA, Struhl K. 2006. Asf1 mediates histone eviction and deposition during elongation by RNA polymerase II. *Mol Cell.*, 22: 415-22.
4. Lee JS, Shukla A, Schneider J, Swanson SK, Washburn MP, Florens L, Bhaumik SR, Shilatifard A. 2007. Histone crosstalk between H2B monoubiquitination and H3 methylation mediated by COMPASS. *Cell*, 131: 1084-96.
5. Biswas D, Dutta-Biswas R, Mitra D, Shibata Y, Strahl BD, Formosa T, Stillman DJ. 2006. Opposing roles for Set2 and yFACT in regulating TBP binding at promoters. *EMBO J.*, 25: 4479-89.
6. Thomas BJ, Rothstein R. 1989. Elevated recombination rates in transcriptionally active DNA. *Cell.*, 56: 619-30.
7. Roberts SM, Winston F. 1996. SPT20/ADA5 encodes a novel protein functionally related to the TATA-binding protein and important for transcription in *Saccharomyces cerevisiae*. *Mol Cell Biol.*, 16: 3206–3213.
8. Henry KW, Wyce A, Lo WS, Duggan LJ, Emre NC, Kao CF, Pillus L, Shilatifard A, Osley MA, Berger SL. 2003. Transcriptional activation via sequential histone H2B ubiquitylation and deubiquitylation, mediated by SAGA-associated Ubp8. *Genes Dev.*, 17: 2648-63.
9. Shukla A, Stanojevic N, Duan Z, Sen P, Bhaumik SR. 2006. Ubp8p, a histone deubiquitinase whose association with SAGA is mediated by Sgf11p, differentially regulates lysine 4 methylation of histone H3 in vivo. *Mol. Cell. Biol.*, 26: 3339–3352.
10. Malik S, Bagla S, Chaurasia P, Duan Z, Bhaumik SR. 2008. Elongating RNA polymerase II is disassembled through specific degradation of its largest but not other subunits in response to DNA damage in vivo. *J. Biol. Chem.*, 283: 6897-905.
11. Malik S, Chaurasia P, Lahudkar S, Durairaj G, Shukla A, Bhaumik SR. 2010. Rad26p, a transcription-coupled repair factor, is recruited to the site of DNA lesion in an elongating RNA polymerase II-dependent manner in vivo. *Nucleic Acids Res.*, 38: 1461–1477.

12. Russell SJ, Johnston SA. 2001. Evidence that proteolysis of Gal4 cannot explain the transcriptional effects of proteasome ATPase mutations. *J. Biol. Chem.*, 276: 9825–9831
13. Uprety B, Lahudkar S, Malik S, Bhaumik SR. 2012. The 19S proteasome subcomplex promotes the targeting of NuA4 HAT to the promoters of ribosomal protein genes to facilitate the recruitment of TFIID for transcriptional initiation *in vivo*. *Nucleic Acids Res.*, 40: 1969-83.
14. Uprety B, Sen R, Bhaumik SR 2015. Eaf1p is required for recruitment of NuA4 in targeting TFIID to the promoters of the ribosomal protein genes for transcriptional initiation *in vivo*. *Mol. Cell. Biol.*, 35: 2947-64.
15. Houseley J, Rubbi L, Grunstein M, Tollervey D, Vogelauer M. 2008. A ncRNA modulates histone modification and mRNA induction in the yeast GAL gene cluster. *Mol. Cell*, 32: 685–695.

Supplementary Figure S1:

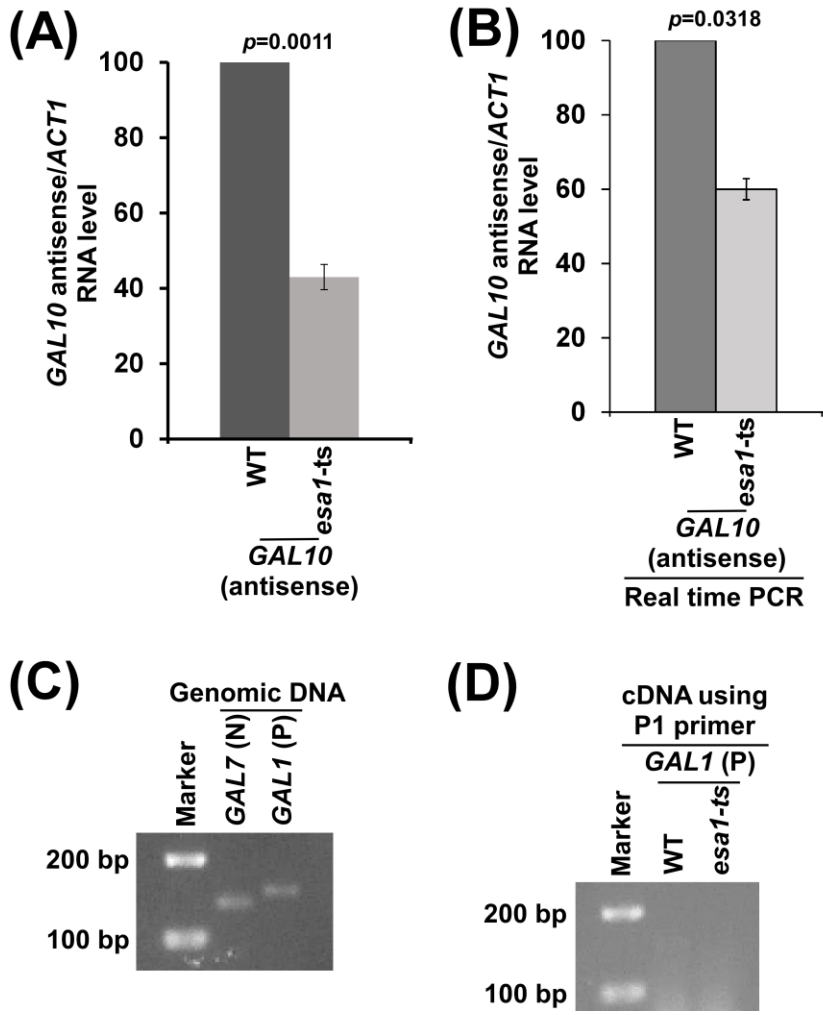

Supplementary Figure S2:

(A)

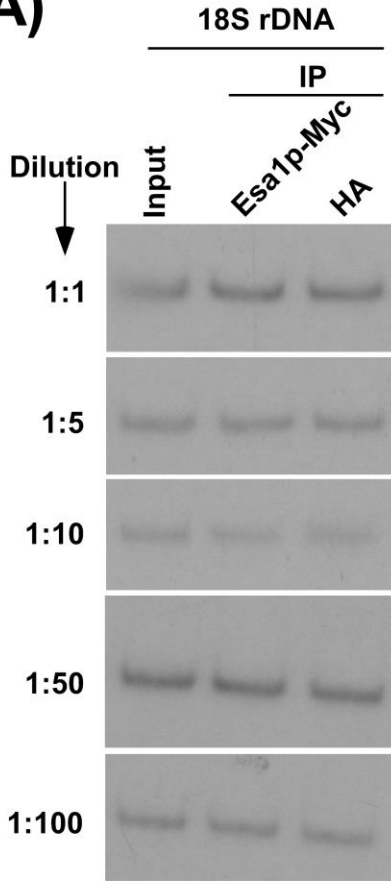

(B)

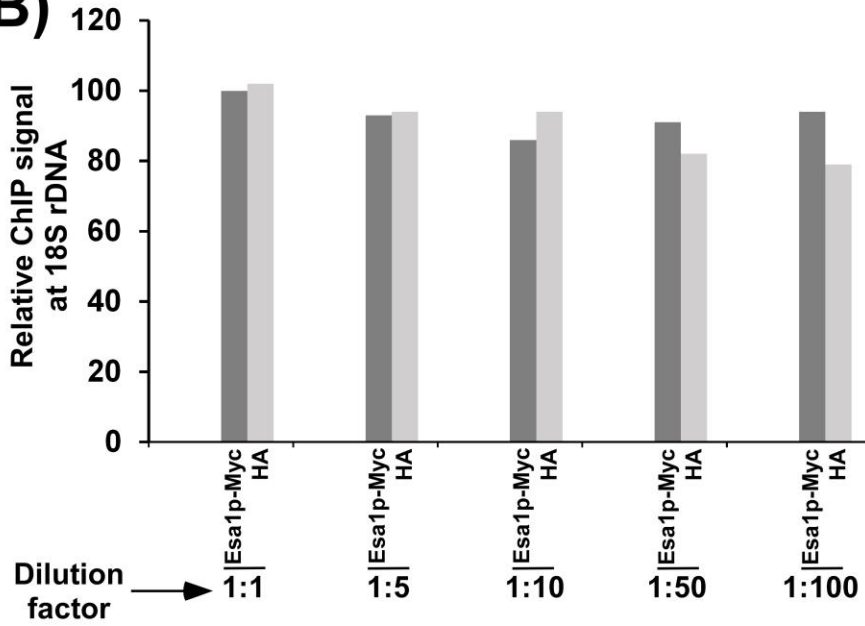

Supplement: MCB.00808-15_zmb999101166so1.pdf [file MCB.00808-15_zmb999101166so1.pdf]
